# Supplementary material
Source: MDPI journal article supplement (https://www.mdpi.com/2311-5637/10/5/238)
Supplement: s1 [file s1]

Table S1. Volatile aroma compounds (mg/L) from Nanfeng tangerine wines

| Compound                    | CAS       | Sc           | Hg-10-Sc     | (Ce.Hg) -<br>10-Sc | (Ce.Ht) -<br>10-Sc | (Hg.Ht) -<br>10-Sc | (Ce.Hg.<br>Ht) -10-<br>Sc | Sc:(Ce.H<br>g) -1:1 | Sc:(Ce.Ht<br>) -1:1 | Sc:(Hg.H<br>t) -1:1 | Sc:(Ce.Hg.<br>Ht) -1:1 | Sc:(Ce.Hg<br>) -1:100 | Sc:(Ce.Ht<br>) -1:100 | Sc:(Hg.H<br>t) -1:100 | Sc:(Ce.Hg.<br>Ht) -1:100 |
|-----------------------------|-----------|--------------|--------------|--------------------|--------------------|--------------------|---------------------------|---------------------|---------------------|---------------------|------------------------|-----------------------|-----------------------|-----------------------|--------------------------|
| <b>Montanol<br/>diagram</b> |           |              |              |                    |                    |                    |                           |                     |                     |                     |                        |                       |                       |                       |                          |
| <b>2,3-butanediol</b>       | 513-85-9  | -            | -            | -                  | -                  | 4.98±0.08<br>a     | 3.91±0.10<br>b            | 2.20±0.07<br>f      | 3.56±0.06<br>c      | 1.97±0.03<br>g      | -                      | 1.87±0.05<br>g        | -                     | 2.87±0.06<br>e        | -                        |
| <b>phenylethanol</b>        | 1960/12/8 | 197.23±0.21j | 301.02±2.07a | 248.88±1.25d       | 194.01±1.50k       | 239.30±1.25e       | 267.55±1.65c              | 200.22±0.88i        | 215.26±1.52g        | 232.40±1.42f        | 275.28±1.89b           | 159.55±0.46m          | 207.21±1.46h          | 199.33±0.76ij         | 191.13±1.52l             |
| <b>Decanol</b>              | 112-30-1  | 1.53±0.04a   | -            | -                  | -                  | -                  | -                         | -                   | -                   | -                   | -                      | 0.95±0.01<br>b        | -                     | -                     | -                        |
| <b>Esters</b>               |           |              |              |                    |                    |                    |                           |                     |                     |                     |                        |                       |                       |                       |                          |
| <b>Butyl acetate</b>        | 123-86-4  | -            | -            | 2.53±0.04<br>b     | 2.71±0.10          | 2.05±0.04<br>d     | 1.33±0.00<br>f            | 1.43±0.04<br>e      | -                   | 1.22±0.07<br>g      | -                      | -                     | -                     | 2.37±0.06<br>c        | -                        |
| <b>Ethyl butyrate</b>       | 105-54-4  | -            | -            | -                  | -                  | -                  | -                         | -                   | -                   | -                   | -                      | -                     | 1.06±0.01             | -                     | -                        |
| <b>Isoamyl acetate</b>      | 123-92-2  | 7.92±0.01l   | 36.07±0.21f  | 40.95±0.12b        | 7.46±0.12m         | 46.99±0.12a        | 7.70±0.00l                | 38.73±0.10c         | 9.94±0.13j          | 8.42±0.01k          | 14.11±0.06h            | 3.13±0.03m            | 36.82±0.23e           | 38.09±0.10d           | 12.81±0.06i              |
| <b>Ethyl caproate</b>       | 123-66-0  | 1.36±0.02l   | 11.25±0.03a  | 9.34±0.03c         | 1.52±0.07k         | 9.20±0.03d         | 2.05±0.20i                | 10.08±0.03b         | 1.37±0.05l          | 1.31±0.06l          | 5.10±0.02g             | 0.97±0.06m            | 8.50±0.01e            | 8.23±0.03f            | 1.68±0.08j               |
| <b>Octyl formate</b>        | 112-32-3  | 1.66±0.01b   | -            | -                  | -                  | -                  | -                         | -                   | -                   | -                   | -                      | -                     | -                     | -                     | -                        |
| <b>P-toluene isocyanate</b> | 622-58-2  | -            | 6.17±0.06a   | 5.19±0.06b         | -                  | 4.03±0.06c         | 5.24±0.05b                | 2.31±0.04e          | 1.67±0.00f          | 1.46±0.07g          | -                      | 1.49±0.06g            | 1.74±0.03f            | 2.47±0.08d            | -                        |
| <b>Ethyl caprylate</b>      | 106-32-1  | 7.59±0.06h   | 11.22±0.14g  | 13.73±0.08e        | 4.54±0.02j         | 15.85±0.08c        | 4.62±0.12j                | 16.01±0.08c         | 4.71±0.02j          | 4.56±0.02j          | 5.61±0.01i             | 2.88±0.02k            | 13.28±0.16f           | 14.50±0.09d           | 22.52±0.27b              |
| <b>Phenethyl acetate</b>    | 103-45-7  | 43.75±0.10k  | 172.02±0.54d | 51.65±0.28i        | 40.76±0.26l        | 54.24±0.28gh       | 53.68±0.16h               | 66.54±0.30f         | 51.43±0.33i         | 69.66±0.38e         | 86.49±0.64a            | 30.41±0.14m           | 54.67±0.43g           | 47.83±0.22j           | 72.95±0.63c              |
| <b>Ethyl caprate</b>        | 110-38-3  | 22.37±0.08d  | 18.89±0.18e  | 14.21±0.15h        | 5.56±0.06m         | 17.48±0.15f        | 10.04±0.07j               | 23.36±0.16c         | 8.71±0.09k          | 13.72±0.02i         | 16.41±0.14g            | 5.72±0.05l            | 16.68±0.19g           | 16.28±0.11l           | 40.10±0.41b              |

|                                       |            |              |             |             |             |              |             |             |             |              |             |             |              |             |             |
|---------------------------------------|------------|--------------|-------------|-------------|-------------|--------------|-------------|-------------|-------------|--------------|-------------|-------------|--------------|-------------|-------------|
| <b>Ethyl laurate</b>                  | 106-33-2   | 4.42±0.03h   | 6.26±0.11e  | 3.96±0.07i  | 2.21±0.06l  | 6.67±0.07d   | 3.32±0.04k  | 8.92±0.08c  | 4.02±0.08i  | 5.83±0.10f   | 10.91±0.11a | 1.42±0.04m  | 5.70±0.08f   | 4.71±0.10g  | 3.62±0.08j  |
| <b>Terpenes</b>                       |            |              |             |             |             |              |             |             |             |              |             |             |              |             |             |
| <b>Linalool</b>                       | 78-70-6    | 5.17±0.03k   | 7.67±0.02h  | 9.55±0.01d  | 8.28±0.04g  | 11.02±0.011c | 11.54±0.19b | 7.35±0.02i  | 7.25±0.11i  | 8.25±0.01g   | 5.75±0.10j  | 5.83±0.03j  | 8.43±0.02f   | 9.62±0.01d  | 12.04±0.08a |
| <b>4-terpenol</b>                     | 562-74-3   | 12.30±0.02d  | 10.05±0.03g | 10.38±0.13f | 10.79±0.03e | 13.77±0.13b  | 12.95±0.13c | 9.00±0.10i  | 8.13±0.09j  | 9.70±0.00h   | 14.32±0.13a | 6.49±0.00k  | 9.72±0.03h   | 10.53±0.12f | 13.60±0.17b |
| <b>A-terpenol</b>                     | 10482-56-1 | 17.84±0.026i | 21.31±0.23d | 20.88±0.18e | 19.76±0.08f | 22.95±0.18b  | 25.32±0.24a | 17.41±0.14j | 15.96±0.16k | 17.98±0.04hi | 22.23±0.18c | 12.65±0.00l | 18.04±0.21hi | 20.95±0.13e | 18.17±0.20h |
| <b>Citronellol</b>                    | 106-22-9   | 1.23±0.04e   | -           | -           | 2.49±0.02c  | 2.78±0.00a   | -           | -           | -           | -            | -           | 1.95±0.05d  | 2.66±0.05b   | 2.42±0.08c  | -           |
| <b>Styrene</b>                        | 100-42-5   | 12.46±0.01c  | -           | -           | 7.73±0.04g  | -            | -           | -           | 11.48±0.12e | 11.83±0.04d  | 11.28±0.02f | 5.01±0.03h  | -            | -           | 16.32±0.08a |
| <b>D-limonene</b>                     | 5989-27-5  | 6.25±0.02g   | 2.69±0.02j  | 3.97±0.07h  | 10.21±0.06c | 4.07±0.07h   | 9.42±0.12d  | 2.96±0.06i  | 8.41±0.10e  | 8.37±0.12e   | 7.53±0.13f  | 2.01±0.02l  | 2.22±0.02k   | 3.93±0.04h  | 17.87±0.19a |
| <b>Y-terpinene</b>                    | 98-86-2    | -            | -           | -           | -           | -            | -           | -           | -           | -            | -           | -           | -            | -           | 1.00±0.08   |
| <b>Aldehydes and ketones</b>          |            |              |             |             |             |              |             |             |             |              |             |             |              |             |             |
| <b>Nonyl aldehyde</b>                 | 124-19-6   | -            | -           | -           | 1.61±0.03   | -            | -           | -           | -           | -            | -           | -           | -            | 2.98±0.08a  | -           |
| <b>Capric aldehyde</b>                | 112-31-2   | -            | -           | -           | 1.13±0.03   | -            | -           | -           | -           | -            | -           | -           | -            | -           | -           |
| <b>2,5-dimethyl benzaldehyde</b>      | 5779-94-2  | 1.48±0.04a   | -           | -           | -           | -            | -           | -           | -           | -            | 1.42±0.09   | -           | -            | -           | -           |
| <b>2-hydroxy-5-methylacetophenone</b> | 1450-72-2  | 12.28±0.04b  | -           | -           | -           | -            | -           | -           | -           | -            | 23.49±0.18a | -           | -            | -           | -           |
| <b>Phenols</b>                        |            |              |             |             |             |              |             |             |             |              |             |             |              |             |             |
| <b>Thyme phenols</b>                  | 89-83-8    | 5.47±0.07b   | 4.76±0.06c  | 4.30±0.09d  | 2.72±0.11i  | 3.52±0.09e   | 2.36±0.01j  | 2.97±0.07h  | 2.98±0.01h  | 3.15±0.02g   | 6.07±0.10a  | 3.05±0.03gh | 2.96±0.07h   | 3.38±0.06ef | 3.34±0.07f  |
| <b>Acids</b>                          |            |              |             |             |             |              |             |             |             |              |             |             |              |             |             |

|                                 |           |              |              |              |              |              |              |              |              |              |              |              |              |              |              |
|---------------------------------|-----------|--------------|--------------|--------------|--------------|--------------|--------------|--------------|--------------|--------------|--------------|--------------|--------------|--------------|--------------|
| Caprylic acids                  | 124-07-2  | -            | 11.71±0.15a  | -            | -            | -            | -            | -            | 8.57±0.12b   | 6.30±0.10c   | -            | 5.55±0.03d   | 4.91±0.10e   | -            | -            |
| Other                           |           |              |              |              |              |              |              |              |              |              |              |              |              |              |              |
| M-xylene                        | 108-38-3  | 3.84±0.01c   | -            | -            | 2.74±0.11f   | -            | -            | -            | 3.60±0.08d   | 3.41±0.05e   | 4.26±0.03b   | 1.09±8.05h   | -            | -            | 6.33±0.03a   |
| 1-methyl-3-isopropylbenzene     | 535-77-3  | -            | -            | -            | -            | -            | -            | -            | -            | -            | -            | -            | -            | -            | 0.96±0.11    |
| 1-isopropenyl-3-methylbenzene   | 1124-20-5 | 1.11±0.02b   | -            | -            | -            | -            | -            | -            | -            | -            | 1.38±0.07a   | -            | -            | 1.06±1.06b   | -            |
| 2-methyl-1,5-dioxane            | 6413-26-9 | 4.17±0.04    | -            | -            | -            | -            | -            | -            | -            | -            | -            | -            | -            | -            | -            |
| [5,5]undecane                   |           |              |              |              |              |              |              |              |              |              |              |              |              |              |              |
| 4hydroxy-3-methoxy Benzonitrile | 4421/8/3  | -            | 28.23±0.25d  | 32.53±0.21b  | 15.21±0.18l  | 41.75±0.21a  | 30.61±0.14c  | 24.29±0.07e  | 19.79±0.09j  | 21.29±0.07h  | -            | 22.28±0.05g  | 23.73±0.22f  | 30.43±0.06c  | 15.89±0.11k  |
| In total                        |           | 371.41±0.51j | 549.31±4.03a | 475.46±2.38e | 341.44±2.28k | 500.66±2.38d | 451.63±3.04f | 433.78±1.88g | 386.84±2.98i | 430.82±2.11g | 511.64±3.77c | 274.30±0.89l | 417.26±3.26h | 420.05±1.52h | 453.32±3.77f |

Table S2. Volatile odor-active compounds (OAV≥1) in Nanfeng tangerine wines

| Compounds     | Aroma threshold (μg/L) | Description           | Sc    | Hg-10-Sc | (Ce.Hg)-10-Sc | (Ce.Ht)-10-Sc | (Hg.Ht)-10-Sc | (Ce.Hg.Ht)-10-Sc | Sc:(Ce.Hg.Ht)-1:1 | Sc:(Ce.Hg.Ht)-1:1 | Sc:(Hg.Ht)-1:1 | Sc:(Ce.Hg.Ht)-1:1 | Sc:(Ce.Hg.Ht)-1:100 | Sc:(Ce.Hg.Ht)-1:100 | Sc:(Hg.Ht)-1:100 | Sc:(Ce.Hg.Ht)-1:100 |
|---------------|------------------------|-----------------------|-------|----------|---------------|---------------|---------------|------------------|-------------------|-------------------|----------------|-------------------|---------------------|---------------------|------------------|---------------------|
| Phenylethanol | 14.00                  | Rose                  | 14.09 | 21.5     | 17.78         | 13.86         | 17.09         | 19.11            | 14.3              | 15.38             | 16.6           | 19.66             | 11.4                | 14.8                | 14.24            | 13.65               |
| Decanol       | 0.50                   | Fruit, sweet, flower, | 3.07  | <1       | <1            | <1            | <1            | <1               | <1                | <1                | <1             | <1                | 1.91                | <1                  | <1               | <1                  |

|                             |      |                             |         |         |         |         |         |         |         |         |         |         |         |         |         |          |
|-----------------------------|------|-----------------------------|---------|---------|---------|---------|---------|---------|---------|---------|---------|---------|---------|---------|---------|----------|
|                             |      | special<br>fatty            |         |         |         |         |         |         |         |         |         |         |         |         |         |          |
| <b>Butyl acetate</b>        | 1.83 | Fruit                       | <1      | <1      | 1.38    | 1.48    | 1.12    | <1      | <1      | <1      | <1      | <1      | <1      | <1      | 1.29    | <1       |
| <b>Ethyl butyrate</b>       | 0.02 | Strawberry, apple, banana   | <1      | <1      | <1      | <1      | <1      | <1      | <1      | <1      | <1      | <1      | <1      | <1      | 53.02   | <1       |
| <b>Isoamyl acetate</b>      | 0.03 | Banana, pear                | 263.95  | 1202.46 | 1364.99 | 248.66  | 1566.21 | 256.53  | 1290.96 | 331.41  | 280.69  | 470.27  | 104.4   | 1227.45 | 1269.72 | 426.99   |
| <b>Ethyl caproate</b>       | 0.01 | Pineapple, fruit, flower    | 271.27  | 2249.32 | 1867.89 | 304.62  | 1839.71 | 409.76  | 2015    | 274.46  | 261.95  | 1020.65 | 193.03  | 1699.18 | 1645.99 | 335.64   |
| <b>Ethyl caprylate</b>      | 0.00 | Pineapple, pear, soapy      | 3796.78 | 5609.07 | 6863.66 | 2269.38 | 7925.38 | 2308.86 | 8007.31 | 2353.03 | 2279.13 | 2805.9  | 1442.26 | 6639.12 | 7252    | 11259.46 |
| <b>Phenyl ethyl acetate</b> | 0.25 | Rose, honey, tobacco        | 175.02  | 288.1   | 206.6   | 163.02  | 216.97  | 214.72  | 266.16  | 205.74  | 278.63  | 345.98  | 121.62  | 218.68  | 191.31  | 291.79   |
| <b>Ethyl caprate</b>        | 0.20 | Fruit, fresh                | 111.83  | 94.45   | 71.04   | 27.8    | 87.38   | 50.19   | 116.78  | 43.54   | 68.61   | 82.06   | 28.58   | 83.41   | 81.42   | 200.48   |
| <b>Ethyl laurate</b>        | 0.50 | Flower and fruit            | 8.84    | 12.52   | 7.91    | 4.42    | 13.34   | 6.63    | 17.84   | 8.04    | 11.65   | 21.83   | 2.84    | 11.4    | 9.41    | 7.24     |
| <b>Linalool</b>             | 0.02 | aroma Flower, fruit, muScat | 344.36  | 511.1   | 636.98  | 551.73  | 734.89  | 769.62  | 490.3   | 483.38  | 550.16  | 383.64  | 388.75  | 561.98  | 641.09  | 802.76   |
| <b>4-terpenol</b>           | 5.00 | Pepper                      | 2.46    | 2.01    | 2.08    | 2.16    | 2.75    | 2.59    | 1.8     | 1.63    | 1.94    | 2.86    | 1.3     | 1.94    | 2.11    | 2.72     |
| <b>Alpha terpinol</b>       | 9.18 | Flower, lemon               | 1.94    | 2.32    | 2.27    | 2.15    | 2.5     | 2.76    | 1.9     | 1.74    | 1.96    | 2.42    | 1.38    | 1.96    | 2.28    | 1.98     |
| <b>Citronellol</b>          | 0.70 | Green, lemon                | 1.75    | <1      | <1      | 3.56    | 3.97    | <1      | <1      | <1      | <1      | <1      | 2.79    | 3.79    | 3.45    | <1       |
| <b>Styrene</b>              | 0.16 | Fruit, sweet                | 77.86   | <1      | <1      | 48.33   | <1      | <1      | <1      | 71.75   | 73.92   | 70.51   | 31.29   | <1      | <1      | 101.98   |

|                        |       |                                            |        |       |       |        |       |       |       |       |       |        |       |       |       |        |
|------------------------|-------|--------------------------------------------|--------|-------|-------|--------|-------|-------|-------|-------|-------|--------|-------|-------|-------|--------|
| <b>D-limonene</b>      | 0.20  | Floral,<br>green,<br>citrus                | 31.25  | 13.46 | 19.83 | 51.05  | 20.34 | 47.09 | 14.79 | 42.04 | 41.87 | 37.64  | 10.04 | 11.11 | 19.63 | 89.34  |
| <b>gamma-terpinene</b> | 0.01  | citrus                                     | <1     | <1    | <1    | <1     | <1    | <1    | <1    | <1    | <1    | <1     | <1    | <1    | <1    | 100.18 |
| <b>Nonanal</b>         | 0.02  | Green,<br>slightly<br>pungent              | <1     | <1    | <1    | 107.24 | <1    | <1    | <1    | <1    | <1    | <1     | <1    | <1    | <1    | 198.78 |
| <b>Decenal</b>         | 0.01  | Sweet,<br>citrus,<br>flower                | <1     | <1    | <1    | 112.9  | <1    | <1    | <1    | <1    | <1    | <1     | <1    | <1    | <1    | <1     |
| <b>Thymol</b>          | 0.05  | Thyme                                      | 109.32 | 95.29 | 86.1  | 54.41  | 70.49 | 47.24 | 59.46 | 59.58 | 62.98 | 121.46 | 61.07 | 59.17 | 67.67 | 66.77  |
| <b>Caprylic acid</b>   | 10.00 | Rancid,<br>harsh,<br>cheese,<br>fatty acid | <1     | 1.17  | <1    | <1     | <1    | <1    | <1    | <1    | <1    | <1     | <1    | <1    | <1    | <1     |
| <b>M-xylene</b>        | 1.10  | Strong<br>aromatic<br>smell                | 3.49   | <1    | <1    | 2.49   | <1    | <1    | <1    | 3.27  | 3.1   | 3.87   | <1    | <1    | <1    | 5.76   |

---
